# Supplementary material
Source: publisher figshare collection journal article supplement (https://karger.figshare.com/ndownloader/files/8710501)
Supplement: Supplementary file 1 [file 8710501]

Figure 1

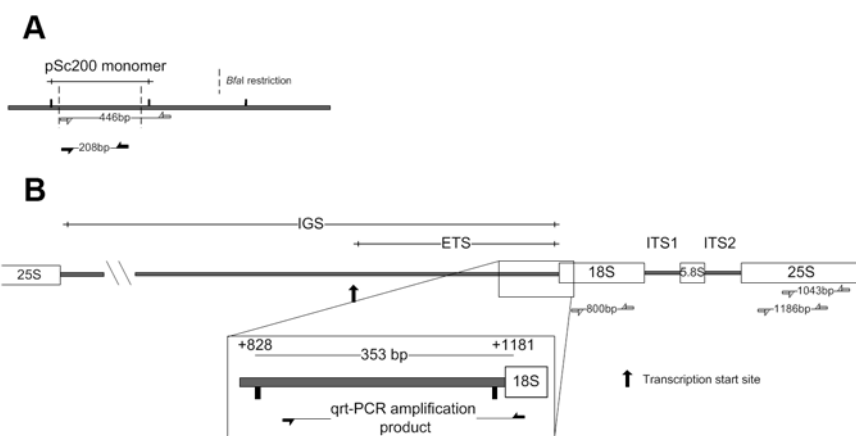

Figure 2

**A**

| Accession | ID          | Query start | Query end | Subject start | Subject end | Strand | Score | Evalue |
|-----------|-------------|-------------|-----------|---------------|-------------|--------|-------|--------|
| MI0013263 | osa-MIR2921 | 43          | 90        | 129           | 176         | -      | 87    | 3.3    |
| MI0010876 | sbi-MIR169k | 25          | 52        | 11            | 38          | +      | 86    | 3.9    |
| MI0010897 | sbi-MIR396d | 254         | 288       | 48            | 82          | +      | 85    | 4.8    |
| MI0019046 | osa-MIR5526 | 194         | 228       | 20            | 54          | +      | 85    | 4.8    |

**B**

|                |                                                                  |           |             |
|----------------|------------------------------------------------------------------|-----------|-------------|
| Query: 43-90   | <u>osa-MIR2921</u> : 129-176                                     | score: 87 | evalue: 3.3 |
| pSc200         | 90    aaauuugagcuguaaaauugcgauaacuucauuuuuccaaucugcau    43      |           |             |
|                |                                                                  |           |             |
| osa-MIR2921    | 129    aaguucuaucuaaaaauugugauaucuagcuuguuuuauaugaucauuau    176 |           |             |
| <br>           |                                                                  |           |             |
| Query: 25-52   | <u>sbi-MIR169k</u> : 11-38                                       | score: 86 | evalue: 3.9 |
| pSc200         | 25    ugauaugccggcucucaaaaaauugagc    52                         |           |             |
|                |                                                                  |           |             |
| sbi-MIR169k    | 11    ugacuugccggcuccucaaaaaugaagc    38                         |           |             |
| <br>           |                                                                  |           |             |
| Query: 254-288 | <u>sbi-MIR396d</u> : 48-82                                       | score: 85 | evalue: 4.8 |
| pSc200         | 254    ugcuuuguucacacuugcuuuugagagucucgaucaa    288              |           |             |
|                |                                                                  |           |             |
| sbi-MIR396d    | 48    ugcuuugcucucgcgucgcuuuugugaugguucaa    82                  |           |             |
| <br>           |                                                                  |           |             |
| Query: 194-228 | <u>osa-MIR5526</u> : 20-54                                       | score: 85 | evalue: 4.8 |
| pSc200         | 194    aaguccuaucaccucaauuuccccaauagcuuucca    228               |           |             |
|                |                                                                  |           |             |
| osa-MIR5526    | 20    aagaccucucaccucagcucucaaacacauuacca    54                  |           |             |

## Supplementary Material (Legends)

**Figure 1. Schematic representation of pSc200 and 45S rDNA sequences.** **A** Schematic representation of the tandem organization of pSc200 repetitive sequence showing *Bfa*I restriction sites and primers used to produce pSc200 FISH probe (gray arrows) and for quantitative real time PCR analysis (black arrows). **B** Schematic representation of 45S rDNA subunit showing primers used to produce the rDNA FISH probe (gray arrows) and for quantitative real time PCR analysis (black arrows).

**Figure 2. pSc200 microRNA prediction.** MicroRNA prediction for pSc200 sequence (EU333404.1) obtained from miRBase (<http://www.mirbase.org/>) using BLASTN searching for stem-loop sequences in the Monocotyledons database. **A** Matches for pSc200 nucleotide sequence. **B** Alignment of pSc200 to hairpin miRNAs.
